# Supplementary material
Source: PubMed Central journal article supplement (PMC11131770)
Supplement: 18_2008_8255_MOESM1_ESM.pdf [file 18_2008_8255_MOESM1_ESM.pdf]

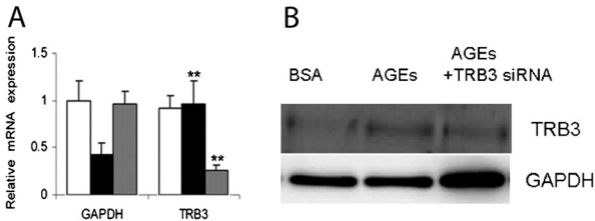

**Supplement 1.** The inhibitory effect of on TRB3 mRNA and protein expression. (A) The mRNA expression of GAPDH and TRB3 in transfected cardiac fibroblasts with 30  $\mu\text{mol/L}$  control siRNA (white squares), 30  $\mu\text{mol/L}$  GAPDH siRNA (black square) and 30  $\mu\text{mol/L}$  TRB3 siRNA ( stripe squares). (B) TRB3 siRNA decrease the protein expression of TRB3 induced by AGEs.
