# Supplementary material
Source: PubMed Central journal article supplement (PMC11131770)
Supplement: 18_2008_8255_MOESM2_ESM.pdf [file 18_2008_8255_MOESM2_ESM.pdf]

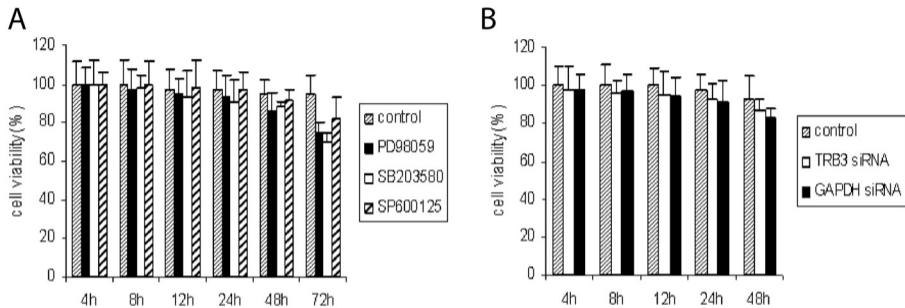

**Supplement 2.** Time-dependent effects of cell viability using MIT assay. 2A. the cell viability of cardiac fibroblasts after treatment with MAPK inhibitors. The cardiac fibroblasts were treated with a specific ERK1/2 inhibitor (pD98059), p38-MAPK inhibitor (SB203580) and JNK inhibitor (SP600125) in 30  $\mu\text{mol/L}$  for 4,8,12, 24, 48 and 72 hours. 2B. the cell viability of cardiac fibroblasts after transfected with siRNAs. The cardiac fibroblasts were transfected with TRB3 siRNA, GAPDH siRNA in 30  $\mu\text{mol/L}$  for 4,8,12,24,48 hours. Data are means  $\pm$ SEM from at least three independent experiments. \* $P < 0.05$  and \*\* $P < 0.01$  compared with the control.
